# Supplementary material for: Weekend versus weekday transplant surgery and outcomes after kidney transplantation in the USA: a retrospective national database analysis
Source: PubMed Central journal article supplement — BMJ Open. 2016 Apr 7;6(4):e010482. doi: 10.1136/bmjopen-2015-010482 (PMC4838691; doi:10.1136/bmjopen-2015-010482), 2016-04-07
Supplement: bmjopen-2015-010482supp_table.pdf [file bmjopen-2015-010482supp_table.pdf]

**Supplemental Table 1a: Patient Survival**

| Variables                        | HR (95% CI)                  |                             |
|----------------------------------|------------------------------|-----------------------------|
|                                  | Univariate                   | Multivariate                |
| Weekend                          | 1.009 (0.92-1.04) P=0.51     | 1.01 (0.98-1.04) P=0.51     |
| <b>Recipient characteristics</b> |                              |                             |
| Age                              | 1.595 (1.58-1.61) P<0.001    | 1.572 (1.55-1.59) P<0.001   |
| Female gender                    | 0.854 (0.83-0.88) P<0.001    | 0.896 (0.87-0.92) P<0.001   |
| Ethnicity                        |                              |                             |
| Black                            | 1.341 (1.315-1.368) P<0.001  | 1.480 (1.437-1.525) P<0.001 |
| Hispanic                         | 0.859 (0.833-0.886) P<0.001  | 0.928 (0.888-0.971) P<0.001 |
| Other                            | 0.695 (0.661-0.732) P<0.001  | 0.757 (0.704-0.815) P<0.001 |
| Diagnosis of ESRD                |                              |                             |
| Diabetes                         | 2.728 (2.63-2.83) P<0.001    | 2.090 (2.01-2.18) P<0.001   |
| Hypertension                     | 1.608 (1.55-1.68) P<0.001    | 1.285 (1.23-1.34) P<0.001   |
| Cystic kidney disease            | 1.004 (0.95-1.06) P=0.90     | 0.751 (0.71-0.80) P<0.001   |
| Other/unknown                    | 1.455 (1.40-1.52) P<0.001    | 1.317 (1.26-1.38) P<0.001   |
| Time on waiting list             | 1.015 (1.01-1.02) P<0.001    | 1.042 (1.03-1.05) P<0.001   |
| Peak PRA                         | 1.003 (0.999-1.008) P = 0.14 | 1.026 (1.021-1.032) P<0.001 |
| Prior kidney Tx                  | 0.892 (0.86-0.93) P<0.001    | 1.135 (1.08-1.19) P<0.001   |
| Cold Ischemia Time               | 1.110 (1.07-1.15) P<0.001    | 1.097 (1.06-1.14) P<0.001   |
| Zero HLA-mismatch                | 1.094 (1.06-1.13) P<0.001    | 1.079 (1.04-1.12) P<0.001   |
| ABO-incompatible Tx              | 0.981 (0.93-1.03) P=0.46     |                             |
| Year of Tx                       |                              |                             |
| 1995                             | 1.017 (0.96-1.08) P=0.60     | 1.006 (0.94-1.07) P=0.85    |
| 1996                             | 1.020 (0.96-1.09) P=0.54     | 0.922 (0.86-0.99) P=0.016   |
| 1997                             | 1.049 (09.9-1.12) P=0.14     | 0.922 (0.86-0.99) P=0.016   |
| 1998                             | 1.045 (0.98-1.11) P=0.18     | 0.909 (0.85-0.97) P=0.005   |
| 1999                             | 1.075 (1.01-1.15) P=0.03     | 0.883 (0.82-0.95) P<0.001   |
| 2000                             | 1.135 (1.07-1.21) P<0.001    | 0.916 (0.85-0.98) P=0.015   |
| 2001                             | 1.118 (1.05-1.19) P=0.001    | 0.864 (0.80-0.93) P<0.001   |
| 2002                             | 1.073 (1.00-1.15) P=0.04     | 0.798 (0.74-0.86) P<0.001   |
| 2003                             | 1.111 (1.04-1.19) P=0.003    | 0.762 (0.70-0.82) P<0.001   |
| 2004                             | 1.116 (1.04-1.20) P=0.002    | 0.753 (0.70-0.81) P<0.001   |
| 2005                             | 1.101 (1.02-1.18) P=0.010    | 0.717 (0.66-0.78) P<0.001   |
| 2006                             | 1.084 (1.00-1.17) P=0.04     | 0.701 (0.65-0.76) P<0.001   |
| 2007                             | 0.971 (0.89-1.06) P=0.50     | 0.623 (0.57-0.68) P<0.001   |
| 2008                             | 0.917 (0.83-1.01) P=0.09     | 0.571 (0.51-0.63) P<0.001   |
| 2009                             | 1.006 (0.90-1.13) P=0.92     | 0.587 (0.52-0.67) P<0.001   |
| <b>Donor characteristics</b>     |                              |                             |
| Age                              | 1.147 (1.14-1.16) P<0.001    | 1.083 (1.07-1.09) P<0.001   |
| Female gender                    | 1.104 (1.08-1.13) P<0.001    | 1.040 (1.01-1.07) P=0.005   |
| Ethnicity                        |                              |                             |
| Black                            | 1.217 (1.184-1.250) P<0.001  | 1.126 (1.078-1.176) P<0.001 |
| Hispanic                         | 0.908 (0.881-0.935) P<0.001  | 1.000 (0.954-1.048) P=0.954 |
| Other                            | 1.011 (0.946-1.081) P=0.75   | 1.031 (0.928-1.146) P=0.567 |

**Supplemental Table 1b: Overall Allograft Survival (including Death)**

| Variables                        | HR (95% CI)                 |                             |
|----------------------------------|-----------------------------|-----------------------------|
|                                  | Univariate                  | Multivariate                |
| Weekend                          | 1.009 (0.99-1.03) P=0.37    | 1.012 (0.98-1.04) P=0.41    |
| <b>Recipient characteristics</b> |                             |                             |
| Age                              | 1.101 (1.09-1.11) P<0.001   | 0.864 (0.86-0.87) P<0.001   |
| Female gender                    | 0.909 (0.89-0.93) P<0.001   | 0.960 (0.94-0.99) P=0.002   |
| Ethnicity                        |                             |                             |
| Black                            | 1.712 (1.670-1.755) P<0.001 | 1.480 (1.437-1.525) P<0.001 |
| Hispanic                         | 0.969 (0.931-1.008) P=0.118 | 0.928 (0.888-0.971) P<0.001 |
| Other                            | 0.789 (0.739-0.842) P<0.001 | 0.757 (0.704-0.815) P<0.001 |
| Diagnosis of ESRD                |                             |                             |
| Diabetes                         | 1.503 (1.47-1.54) P<0.001   | 1.039 (1.00- 1.08) P=0.06   |
| Hypertension                     | 1.321 (1.29-1.36) P<0.001   | 1.107 (1.07-1.15) P<0.001   |
| Cystic kidney disease            | 0.754 (0.73-0.78) P<0.001   | 0.756 (0.72-0.80) P<0.001   |
| Other/unknown                    | 1.236 (1.20-1.27) P<0.001   | 1.104 (1.06-1.15) P<0.001   |
| Peak PRA                         | 1.036 (1.032-1.040) P<0.001 | 1.029 (1.024-1.033) P<0.001 |
| Time on waiting list             | 1.033 (1.03-1.04) P<0.001   | 1.012 (1.01-1.02) P<0.001   |
| Prior kidney Tx                  | 1.125 (1.10-1.15) P<0.001   | 1.198 (1.15-1.25) P<0.001   |
| Cold ischemia time               | 1.180 (1.15-1.21) P<0.001   | 1.211 (1.17-1.25) P<0.001   |
| Zero HLA-mismatch                | 1.284 (1.25-1.32) P<0.001   | 1.404 (1.35-1.46) P<0.001   |
| ABO-incompatible Tx              | 0.959 (0.92-1.00) P= 0.03   | 1.061 (1.01-1.12) P=0.03    |
| Year of Tx                       |                             |                             |
| 1995                             | 0.959 (0.92-1.00) P=0.06    | 0.953 (0.90-1.01) P=0.10    |
| 1996                             | 0.945 (0.90-0.99) P=0.012   | 0.924 (0.87-0.98) P= 0.01   |
| 1997                             | 0.911 (0.87-0.95) P<0.001   | 0.854 (0.80-0.90) P<0.001   |
| 1998                             | 0.904 (0.86-0.95) P<0.001   | 0.845 (0.80-0.90) P<0.001   |
| 1999                             | 0.899 (0.86-0.94) P<0.001   | 0.824 (0.77-0.88) P<0.001   |
| 2000                             | 0.940 (0.90-0.98) P=0.009   | 0.851 (0.80-0.91) P<0.001   |
| 2001                             | 0.883 (0.84-0.93) P<0.001   | 0.763 (0.71-0.82) P<0.001   |
| 2002                             | 0.874 (0.83-0.92) P<0.001   | 0.791 (0.74-0.85) P<0.001   |
| 2003                             | 0.880 (0.84-0.93) P<0.001   | 0.736 (0.69-0.79) P<0.001   |
| 2004                             | 0.862 (0.82-0.91) P<0.001   | 0.739 (0.69-0.79) P<0.001   |
| 2005                             | 0.829 (0.79-0.88) P<0.001   | 0.694 (0.65-0.75) P<0.001   |
| 2006                             | 0.831 (0.79-0.88) P<0.001   | 0.676 (0.63-0.73) P<0.001   |
| 2007                             | 0.754 (0.71-0.80) P<0.001   | 0.622 (0.57-0.68) P<0.001   |
| 2008                             | 0.705 (0.66-0.76) P<0.001   | 0.568 (0.52-0.63) P<0.001   |
| 2009                             | 0.706 (0.65-0.77) P<0.001   | 0.529 (0.47-0.60) P<0.001   |
| <b>Donor characteristics</b>     |                             |                             |
| Age                              | 1.144 (1.14-1.15) P<0.001   | 1.193 (1.18-1.20) P<0.001   |
| Female gender                    | 1.141 (1.12-1.16) P<0.001   | 1.081 (1.05-1.11) P<0.001   |
| Ethnicity                        |                             |                             |
| Black                            | 1.367 (1.322-1.413) P<0.001 | 1.296 (1.249-1.346) P<0.001 |
| Hispanic                         | 0.938 (0.903-0.975) P=0.001 | 1.049 (1.005-1.096) P=0.030 |
| Other                            | 1.082 (0.995-1.177) P=0.064 | 1.086 (0.988-1.195) P=0.088 |

Supplemental Tables 1 a and b- Reference category for the ethnicity was white race, for the diagnosis of ESRD was glomerulonephritis and for the year of Tx was 1994.

HR of PRA refers to an increase of 10. Year 2010 was excluded from the analysis because of the short observation period.

HR, hazard ratio; CI, confidence interval; ESRD, end-stage renal disease; Tx, transplant; PRA, panel reactive antibodies; HLA, human leukocyte antigen.
